# Supplementary material
Source: HighWire-hosted journal article supplement (http://rc.rcjournal.com/highwire/filestream/24665/field_highwire_adjunct_files/0/rc-10652-File002.pdf)
Supplement: rc-10652-File002.pdf [file rc-10652-File002.pdf]

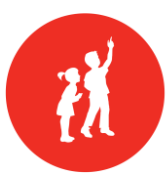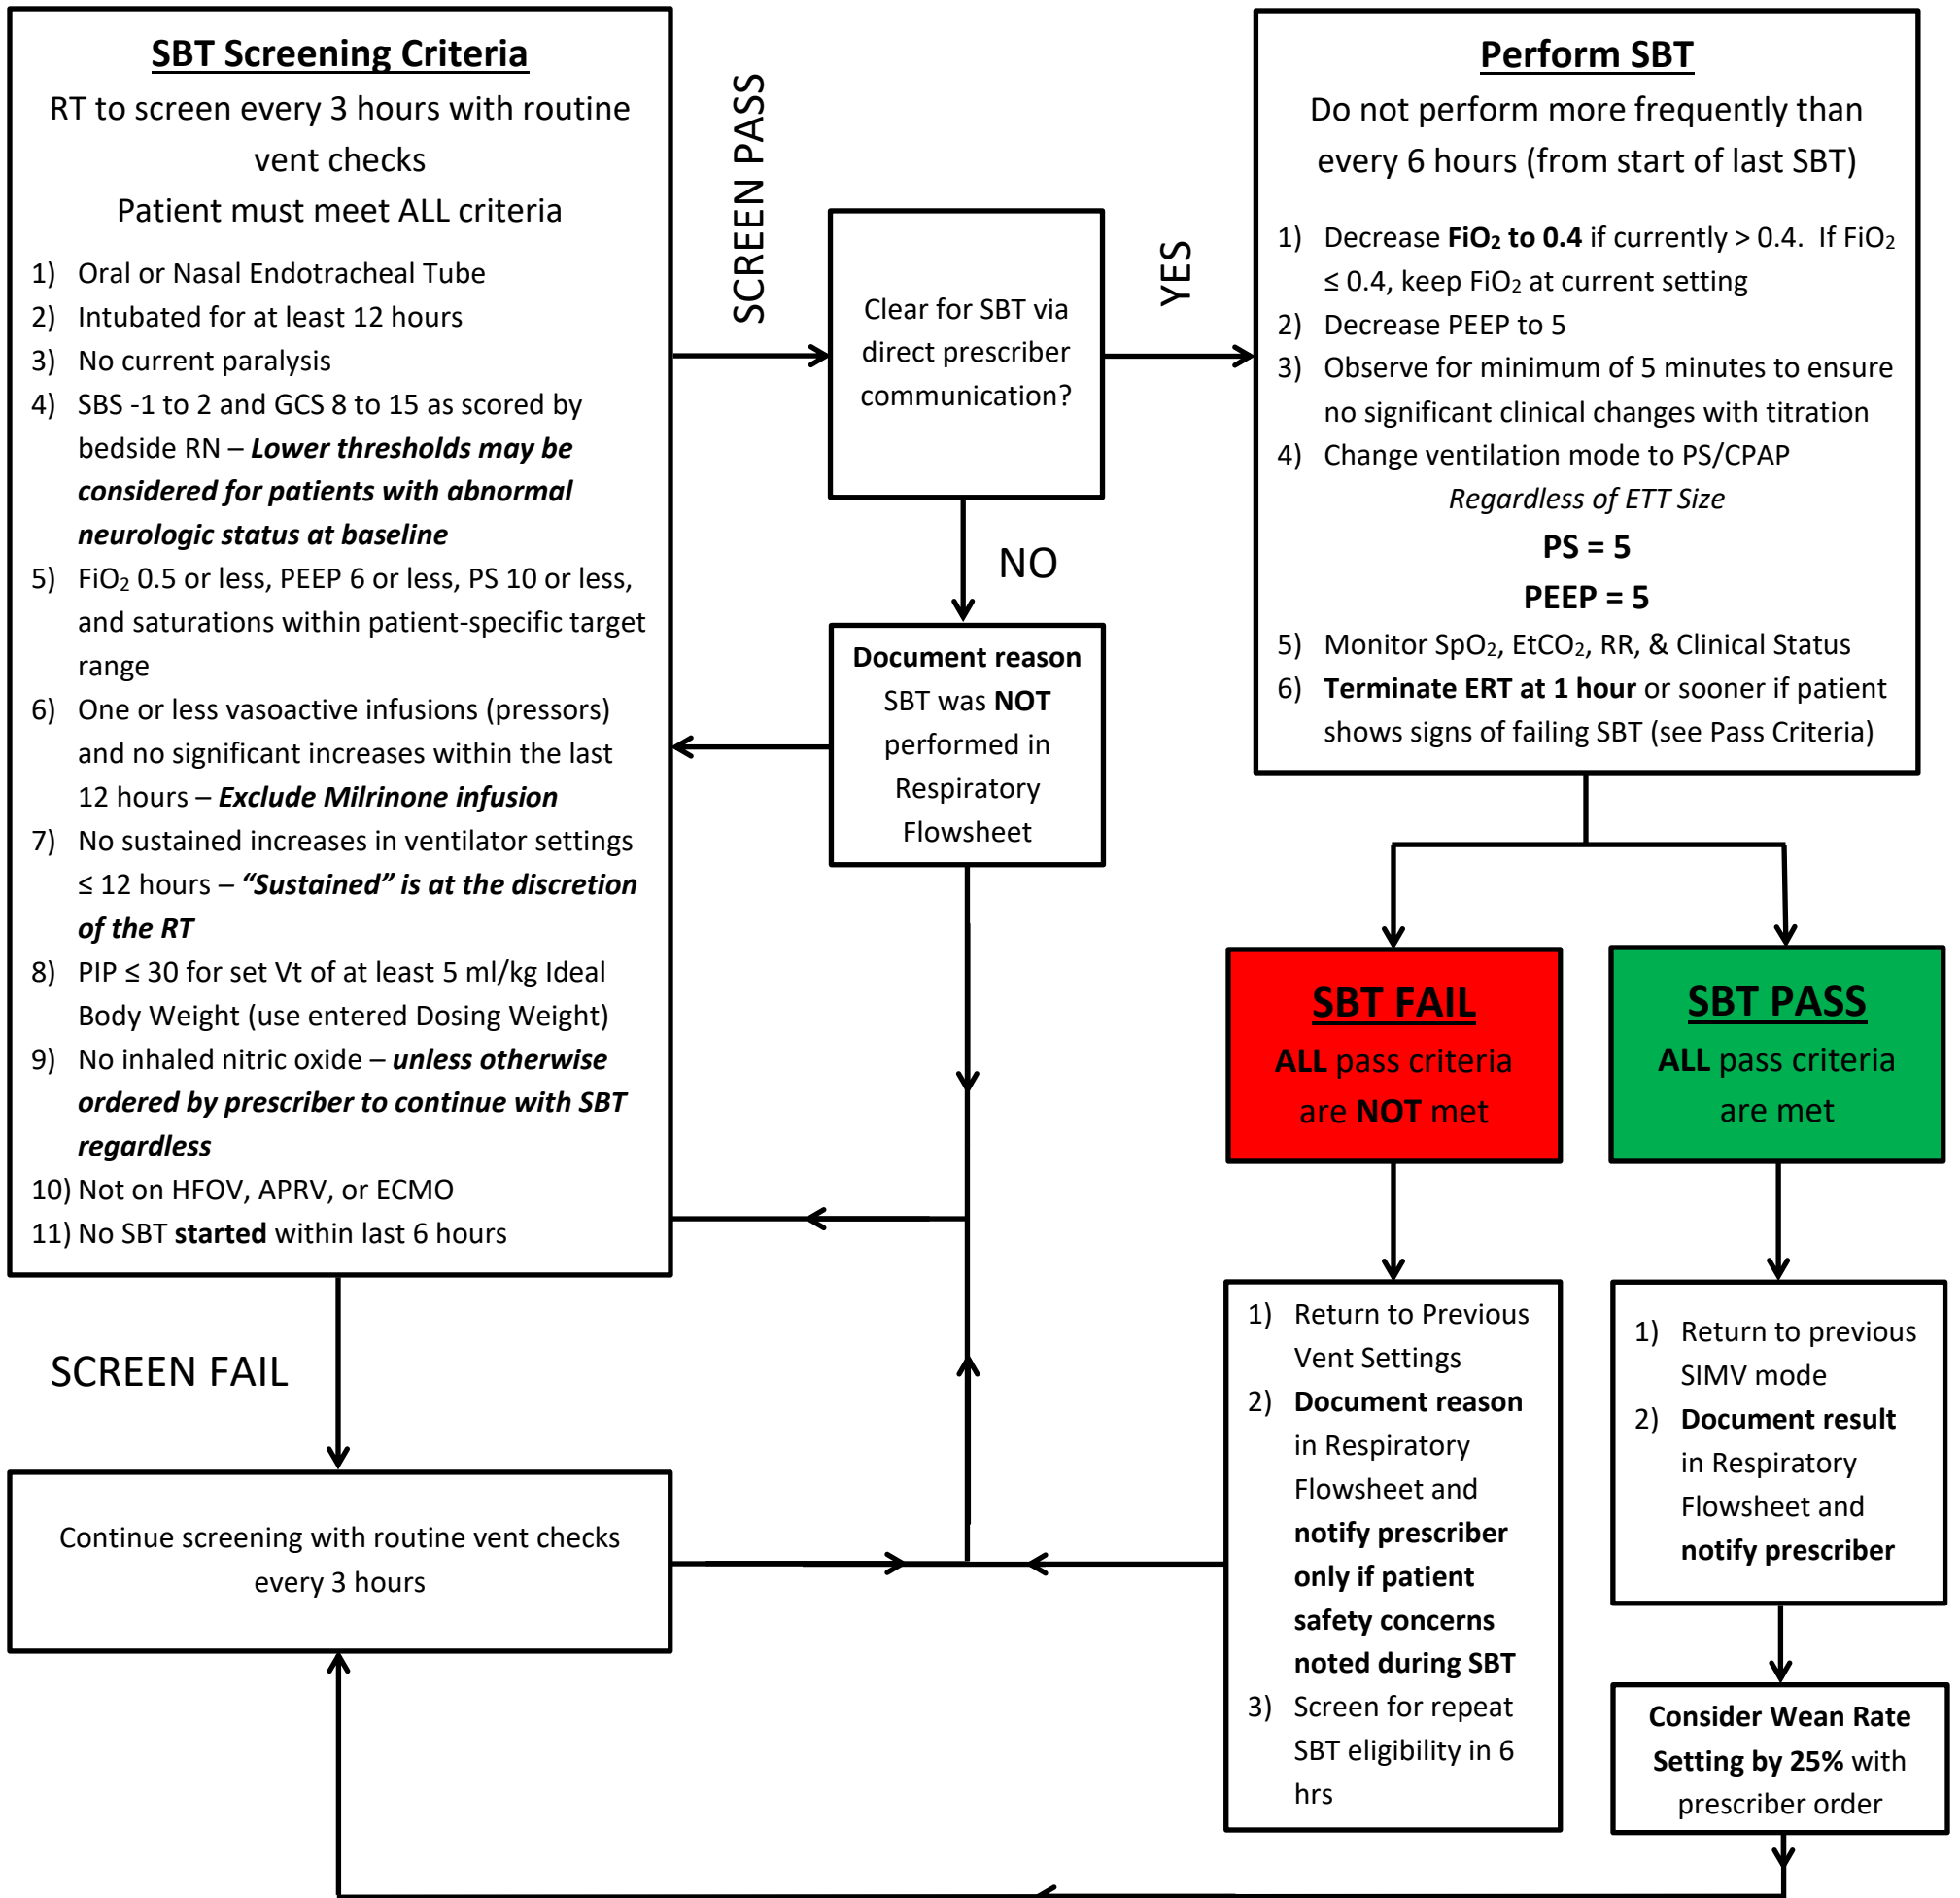

## Spontaneous Breathing Trial Pass Criteria

Must meet ALL criteria and complete 1 hour on an SBT

1. Exhaled Vte  $\geq$  5 ml/kg Ideal Body Weight (using dosing weight;  $\geq$  60kg then use 300 ml)
2. Oxygen Saturation (SpO<sub>2</sub>)  $\geq$  92%  
**Different limits may be considered** for patients with cyanotic heart disease or others at discretion of prescriber team. Temporary decline (< 15 mins) in SpO<sub>2</sub> that improve with suctioning/other interventions may be disregarded at the discretion of the RT, Bedside RN, and/or prescriber (attending, fellow, NP).
3. No increase in Respiratory Rate > 30% from pretest value **sustained for  $\geq$  15 min**
4. No increase in Heart Rate > 30% from pretest value **sustained for  $\geq$  15 min**
5. No increase in End Tidal CO<sub>2</sub> > 10 from pretest value **sustained for  $\geq$  15 min** (if an ETCO<sub>2</sub> detector is present)
6. Hemodynamic stability is maintained throughout test
7. No subjective signs of **significant** respiratory distress at the discretion of the RT, bedside RN, and/or prescriber. Consider whether the distress is any different on an SBT compared to SIMV.
